# Supplementary material
Source: publisher figshare collection journal article supplement (https://karger.figshare.com/articles/dataset/_/13200023)
Supplement: Supplementary file 1 [file 1]

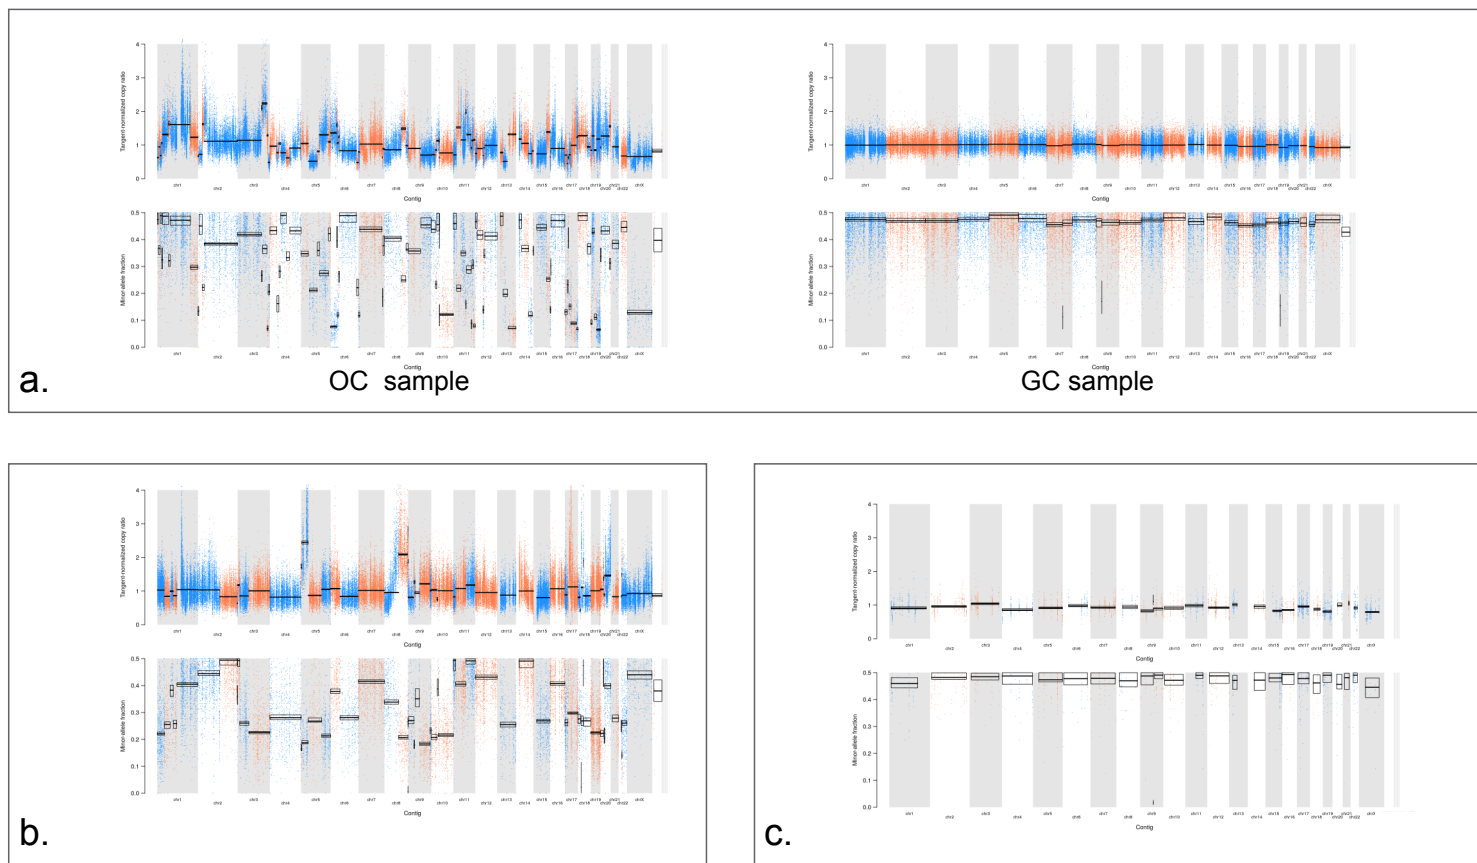

**Supplementary Figure S1.** Allelic copy-number variation (ACNV) plots created from whole-exome (a, b) and targeted sequencing (c) data. **a.** Case GA54: high-level chromosomal instability in ovarian carcinoma (OC) and no instability in gastric carcinoma (GC). **b.** Example of chromosomal instability in *BRCA2*-associated gastric carcinoma (case GC\_V). **c.** Example of plot generated from targeted sequencing data (case CG\_K). Somatic copy number variations (CNVs) were determined with the tools integrated into the Genome Analysis Toolkit (GATK) v.4.beta.5.14.
