# Supplementary material
Source: publisher figshare collection journal article supplement (https://karger.figshare.com/articles/dataset/_/13200023)
Supplement: Supplementary file 2 [file 1]

ABCB1  
ABL1  
ACVR1  
ACVR2  
AKT1  
ALK  
APC  
APOBEC3B  
AR  
ARID1A  
ARID2  
ASTE1  
ASXL1  
ATM  
ATR  
ATRX  
AXIN1  
AXIN2  
B2M  
BAP1  
BCL2  
BCOR  
BRAF  
BRCA1  
BRCA2  
BTK  
C11orf30  
CARD11  
CASP8  
CCNB1  
CCND1  
CCNE1  
CCNE2  
CDH1  
CDK1  
CDK12  
CDK2  
CDK4  
CDK6  
CDKN1B  
CDKN2A  
CDKN2C  
CEBPA  
CHD4  
CHEK2  
CIC  
CREBBP  
CSF1R  
CTCF  
CTNNB1

CYLD  
DDR2  
DHFR  
DICER1  
DNMT3A  
EGFR  
EP300  
ERBB2  
ERBB3  
ERBB4  
ERCC2  
ESR1  
EZH2  
FAT1  
FBXW7  
FGFR1  
FGFR2  
FGFR3  
FLT1  
FLT3  
FLT4  
FOXA1  
FUBP1  
GATA3  
GNA11  
GNAQ  
GNAS  
H3F3A  
HRAS  
IDH1  
IDH2  
IGF1R  
IL7R  
JAK1  
JAK2  
JAK3  
KDM5C  
KDM6A  
KDR  
KEAP1  
KIT  
KMT2C  
KMT2D  
KRAS  
LATS1  
LATS2  
LZTR1  
MAP2K1  
MAP2K4  
MAPK1

MAX  
MCL1  
MED12  
MEN1  
MET  
MLH1  
MSH2  
MSH6  
MTOR  
MYB  
MYC  
MYCL  
MYCN  
MYD88  
NCOR1  
NF1  
NF2  
NFE2L2  
NOTCH1  
NOTCH2  
NRAS  
NSD1  
NTRK1  
PALB2  
PAX5  
PBRM1  
PDGFRA  
PDGFRB  
PIK3CA  
PIK3CB  
PIK3R1  
PIM1  
PMS1  
POLD1  
POLE  
PPM1D  
PPP2R1A  
PPP6C  
PRKAR1A  
PTCH1  
PTEN  
PTPN11  
RAC1  
RAD21  
RAD51C  
RAD51D  
RAF1  
RB1  
RBM10  
RET

*RHOA*  
*RNF43*  
*ROS1*  
*RUNX1*  
*SERPINB3*  
*SERPINB4*  
*SETBP1*  
*SETD2*  
*SF3B1*  
*SMAD2*  
*SMAD4*  
*SMARCA4*  
*SMARCB1*  
*SMO*  
*SOX9*  
*SRSF2*  
*STAG2*  
*STK11*  
*TAF1B*  
*TCF7L2*  
*TET2*  
*TGFBR1*  
*TGFBR2*  
*TP53*  
*TSC1*  
*TSC2*  
*VHL*  
*WT1*  
*XPO1*  
*ZFHX3*
